# Supplementary material for: Nickel(ii) in chelate N2O2 environment. DFT approach and in-depth molecular orbital and configurational analysis
Source: Royal Society of Chemistry journal article supplement (doi:10.1039/c3dt51099a), 2013-01-01
Supplement: c3dt51099a.pdf [file c3dt51099a.pdf]

## Crystal and Molecular Structure of CCDC 932753

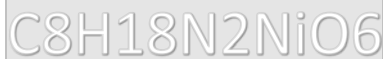

**Abstract.** "IUPAC-name", C<sub>8</sub>H<sub>18</sub>N<sub>2</sub>NiO<sub>6</sub>, M<sub>r</sub> = 296.93, monoclinic, *P*2<sub>1</sub>, *a* = 7.5532(5), *b* = 9.1933(6), *c* = 8.2722(5) Å, β = 100.225(1)°, *V* = 565.29(6) Å<sup>3</sup>, *Z* = 2, *D*<sub>x</sub> = 1.773 gcm<sup>-3</sup>, *F*(000) = 312, μ = 17.35 cm<sup>-1</sup>, λ(MoKα) = 0.71073 Å, *T* = 100(1) K, 5182 reflections measured, *Goof* = 1.055, *wR*(*F*<sup>2</sup>) = 0.0689 for 2671 unique reflections and 226 parameters, 1 restraints and *R*(*F*) = 0.0270 for 2596 reflections obeying *F*<sub>o</sub> ≥ 4.0 σ(*F*<sub>o</sub>) criterion of observability.

The asymmetric unit consists of one molecule of the title compound.

### Experimental

#### X-ray diffraction: Crystal and Molecular Structure.

Beautiful small green-colored block-shaped crystals were obtained by recrystallisation from .....

A crystal with the dimensions of 0.14 x 0.12 x 0.09 mm was mounted on top of a glass fiber and aligned on a *Bruker*<sup>1</sup> *SMART APEX CCD* diffractometer (Platform with full three-circle goniometer). The diffractometer was equipped with a 4K CCD detector set 60.0 mm from the crystal. The crystal was cooled to 100(1) K using the *Bruker KRYOFLEX* low-temperature device. Intensity measurements were performed using graphite monochromated Mo-Kα radiation from a sealed ceramic diffraction tube (*SIEMENS*). Generator settings were 50 KV/ 40 mA. *SMART* was used for preliminary determination of the unit cell constants and data collection control. The intensities of reflections of a hemisphere were collected by a combination of 3 sets of exposures (frames). Each set had a different φ angle for the crystal and each exposure covered a range of 0.3° in ω. A total of 1800 frames were collected with an exposure time of 20.0 seconds per frame. The overall data collection time was 13.0 h. Data integration and global cell refinement was performed with the program *SAINT*. The final unit cell was obtained from the *xyz* centroids of 3992 reflections after integration. Intensity data were corrected for Lorentz and polarization effects, scale variation, for decay and absorption: a multi-scan absorption correction was applied, based on the intensities of symmetry-related reflections measured at different angular settings (*SADABS*)<sup>2</sup>, and reduced to *F*<sub>o</sub><sup>2</sup>. The program suite *SAINTPLUS* was used for space group determination (*XPREP*).<sup>1</sup>

The unit cell<sup>3</sup> was identified as monoclinic. reduced cell calculations did not indicate any higher metric lattice symmetry.<sup>4</sup> Space group *P*2<sub>1</sub>, was derived from the systematic extinctions. The |*E*| distribution statistics were indicative of a non-centrosymmetric space group.<sup>5</sup> and examination of the final atomic coordinates of the structure did not yield obvious extra crystallographic or metric symmetry elements.<sup>6,7</sup>

The structure was solved by direct methods using the program *SIR2004*.<sup>8</sup> The positional and anisotropic displacement parameters for the non-hydrogen atoms were refined. A subsequent difference Fourier synthesis resulted in the location of all the hydrogen atoms, which coordinates and isotropic displacement parameters were refined.

Final refinement on  $F^2$  carried out by full-matrix least-squares techniques converged at  $wR(F^2) = 0.0689$  for 2671 reflections and  $R(F) = 0.0270$  for 2596 reflections with  $F_o \geq 4.0 \sigma(F_o)$  and 226 parameters and 1 restraints. The final difference Fourier map was essentially featureless: no significant peaks ( $0.47(6) \text{ e}/\text{\AA}^3$ ) having chemical meaning above the general background were observed.

The absolute structure of the molecule actually chosen was determined by Flack's<sup>9,10,11,12</sup> refinement ( $x = -0.009(11)$ ).

The positional and anisotropic displacement parameters for the non-hydrogen atoms and isotropic displacement parameters for hydrogen atoms were refined on  $F^2$  with full-matrix least-squares procedures minimizing the function  $Q = \sum_h [w(|(F_o^2) - k(F_c^2)|)^2]$ , where  $w = 1/[\sigma^2(F_o^2) + (aP)^2 + bP]$ ,  $P = [\max(F_o^2, 0) + 2F_c^2] / 3$ ,  $F_o$  and  $F_c$  are the observed and calculated structure factor amplitudes, respectively; ultimately the suggested  $a (=0.0483)$  and  $b (= 0.0955)$  were used in the final refinement.

Crystal data and numerical details on data collection and refinement are given in Table 1. Final fractional atomic coordinates, equivalent displacement parameters and anisotropic displacement parameters for the non-hydrogen atoms are given in Table 2. Molecular geometry data are collected in Table 3. Tables of atom positions, displacement parameters, comprehensive distances and angles and tables of  $(F_o^2)$ ,  $(F_c^2)$  and  $\sigma(F_o^2)$  are given as supplementary material<sup>\*1</sup> for this paper. Neutral atom scattering factors and anomalous dispersion corrections were taken from *International Tables for Crystallography*.<sup>14</sup>

All refinement calculations and graphics were performed on a HP XW6200 (Intel XEON 3.2 Ghz) / Debian-Linux computer at the University of Groningen with the program packages *SHELXL*<sup>14</sup> (least-square refinements), a locally modified version of the program *PLUTO*<sup>16</sup> (preparation of illustrations) and *PLATON*<sup>17</sup> package (checking the final results for missed symmetry with the *MISSYM* option, solvent accessible voids with the *SOLV* option, calculation of geometric data and the *ORTEP*<sup>17</sup> illustrations).

---

\*1 Supplementary crystallographic data for this paper are available from the IUCr electronic archives (Reference: CCDC:932753, as a CIF<sup>13</sup> file). These data can be obtained free of charge via [www.ccdc.cam.ac.uk/conts/retrieving.html](http://www.ccdc.cam.ac.uk/conts/retrieving.html) (or from the Cambridge Crystallographic Data Centre, 12 Union Road, Cambridge CB2 1EZ, UK; fax (+44) 1223-336-033; or e-mail: [deposit@ccdc.cam.ac.uk](mailto:deposit@ccdc.cam.ac.uk)).

## Results and discussion.

The asymmetric unit contains one formula unit molecule with no atom setting at special position. The monoclinic unit cell contains two formula units of the title compound. The chiral centers of N1 and N2 showed both the *R*-configuration and the chiral centers of C2 and C7 showed both the *S*-configuration.<sup>17</sup>

A search of the distances yielded intermolecular- and intramolecular-contacts shorter than the sum of the van der Waals radii<sup>18</sup> for the atoms: the moieties are linked by hydrogen bonds<sup>18,19,20,21</sup> (Table 4.), forming an infinite three-dimensional network along the base vectors.

No missed symmetry (*MISSYM*) or solvent-accessible voids were detected by procedures implemented in *PLATON*.<sup>22,23</sup>

## References.

1. Bruker (2000). *SMART, SAINTPLUS and XPREP. Area Detector Control and Integration Software*. Smart Apex Software Reference Manuals. Bruker Analytical X-ray Instruments. Inc., Madison, Wisconsin, USA.
2. Sheldrick, G.M. (2001). *SADABS. Version 2. Multi-Scan Absorption Correction Program*. University of Göttingen, Germany.
3. Duisenberg, A. J. M. (1992). *J. Appl. Cryst.* **25**, 92-96.
4. Spek, A.L. (1988). *J. Appl. Cryst.* **21**, 578-579.
5. Snow, M.R. & Tiekink, E.R.T. (1988). *Acta Cryst.* **B44**, 676-677
6. Le Page, Y. (1987). *J. Appl. Cryst.* **20**, 264-269.
7. Le Page, Y. (1988). *J. Appl. Cryst.* **21**, 983-984.
8. Burla, M. C., Caliendo, R., Camalli, M., Carrozzini, B., Cascarano, G.L., De Caro, L., Giacovazzo, C., Polidori, G. & Spagna, R. *SIR2004: an improved tool for crystal structure determination and refinement*. *J. Appl. Cryst.* (2005). **38**, 381-388.
9. Flack, H.D. (1983). *Acta Cryst.* **A39**, 876-881.
10. Flack, H.D. & Bernardinelli, G. (1999). *Acta Cryst.* **A55**, 908-915.
11. Flack, H.D. & Bernardinelli, G. (2000). *J. Appl. Cryst.* **33**, 1143-1148.
12. Herbst-Irmer, R. & Sheldrick, G.M. (1998). *Acta Cryst.* **B54**, 443-449.
13. Hall, S.R, Allen, F.H. & Brown, I.D. (1991). *Acta Cryst.* **A47**, 655-685.
14. Wilson, A.J.C. (1992) Ed. *International Tables for Crystallography*, Volume C, Kluwer Academic Publishers, Dordrecht, The Netherlands.
15. Sheldrick, G.M. (1997). *SHELXL-97. Program for the Refinement of Crystal Structures*. University of Göttingen, Germany.
16. Meetsma, A. (2005). *PLUTO. Molecular Graphics Program*. Version of January 2006. University of Groningen, The Netherlands.

17. Spek, A.L. (2005). *PLATON. Program for the Automated Analysis of Molecular Geometry (A Multipurpose Crystallographic Tool)*. Version of August 2005. University of Utrecht, The Netherlands. Spek, A.L. (2003). *J. Appl. Cryst.* **36**, 7-13.
18. Bondi, A. (1964). *J. Phys. Chem.* **68**, 441-451.
19. Berkovitch-Yellin, Z. & Leiserowitz, L. (1984). *Acta Cryst.* **B40**, 159-165.
20. Steiner, Th. (1996). *Cryst. Rev.*, **6**, 1-57.
21. Jeffrey, G.A., Maluszynska, M. & Mitra, J. (1985). *Int. J. Biol. Macromol.* **7**, 336-348.
22. Spek, A.L. (1990). *Acta Cryst.* **A46**, C-34.
23. Spek, A.L. (1994). *Am. Crystallogr. Assoc. Abstr.* **22**, 66.
24. Hahn, T. (1983) Ed. *International Tables for Crystallography, Volume A, Space-group symmetry*, Kluwer Academic Publishers, Dordrecht, The Netherlands.
25. Fisher, R.X. & Tillmanns, E. (1988). *Acta Cryst.* **C44**, 775-776.

**Table 1.**

**a. Crystal data and details of the structure determination.**

|                                                |                                                                |
|------------------------------------------------|----------------------------------------------------------------|
| Moiety_Formula                                 | C <sub>8</sub> H <sub>18</sub> N <sub>2</sub> NiO <sub>6</sub> |
| Formula_Weight, g.mol <sup>-1</sup>            | 296.93                                                         |
| Crystal system                                 | monoclinic                                                     |
| Space group, no. <sup>24</sup>                 | <i>P</i> 2 <sub>1</sub> , 4                                    |
| <i>a</i> , Å                                   | 7.5532(5)                                                      |
| <i>b</i> , Å                                   | 9.1933(6)                                                      |
| <i>c</i> , Å                                   | 8.2722(5)                                                      |
| β, deg                                         | 100.225(1)                                                     |
| <i>V</i> , Å <sup>3</sup>                      | 565.29(6)                                                      |
| Θ range unit cell: min.-max., deg; reflections | 2.50 - 29.75 ; 3992                                            |
| Formula_Z                                      | 2                                                              |
| SpaceGroup_Z                                   | 2                                                              |
| Z (= Formula_Z / SpaceGroup_Z)                 | 1                                                              |
| ρ <sub>calc</sub> , g.cm <sup>-3</sup>         | 1.774                                                          |
| <i>F</i> (000), electrons                      | 312                                                            |
| μ(Mo Kα <sup>-</sup> ), cm <sup>-1</sup>       | 17.35                                                          |
| Color, habit                                   | green, block                                                   |
| Approx. crystal dimension, mm                  | 0.14 x 0.12 x 0.09                                             |

**b. Data collection.**

|                                                                |                                                       |
|----------------------------------------------------------------|-------------------------------------------------------|
| Radiation type; $\lambda$ , Å                                  | Mo K $\bar{\alpha}$ , 0.71073                         |
| Monochromator                                                  | Graphite                                              |
| Measurement device type                                        | Bruker SMART APEX<br>CCD area-detector diffractometer |
| Detector Area resolution (pixels / mm)                         | 4096 x 4096 / 62 x 62 (binned 512)                    |
| Temperature, K                                                 | 100(1)                                                |
| Measurement method                                             | $\varphi$ - and $\omega$ -scans                       |
| $\theta$ range; min. max., deg                                 | 2.74, 28.27                                           |
| Index ranges                                                   | h: -10→10; k: -11→12; l: -11→11                       |
| Min.- Max. absorption transmission factor                      | 0.7795 – 0.8595                                       |
| X-ray exposure time, h                                         | 13.0                                                  |
| Total data                                                     | 5182                                                  |
| Unique data                                                    | 2671                                                  |
| Data with criterion: ( $F_o \geq 4.0 \sigma (F_o)$ )           | 2596                                                  |
| $R_{int} = \sum [ F_o^2 - F_o^2(\text{mean}) ] / \sum [F_o^2]$ | 0.0155                                                |
| $R_{sig} = \sum \sigma(F_o^2) / \sum [F_o^2]$                  | 0.0274                                                |

**c. Refinement.**

|                                                                   |                |
|-------------------------------------------------------------------|----------------|
| Number of reflections                                             | 2671           |
| Number of refined parameters                                      | 226            |
| Number of restraints                                              | 1              |
| Final agreement factors:                                          |                |
| $wR(F^2) = [\sum [w(F_o^2 - F_c^2)^2] / \sum [w(F_o^2)^2]]^{1/2}$ | 0.0689         |
| Weighting scheme: <i>a</i> , <i>b</i>                             | 0.0483, 0.0955 |
| $w = 1/[\sigma^2(F_o^2) + (aP)^2 + bP]$                           |                |
| And $P = [\max(F_o^2, 0) + 2F_c^2] / 3$                           |                |
| $R(F) = \sum (  F_o  -  F_c  ) / \sum  F_o $                      | 0.0270         |
| For $F_o > 4.0 \sigma(F_o)$                                       |                |
| Absolute-Structure parameter Flack's <i>x</i>                     | -0.009(11)     |
| $GooF = S = [\sum [w(F_o^2 - F_c^2)^2] / (n-p)]^{1/2}$            | 1.055          |
| <i>n</i> = number of reflections                                  |                |
| <i>p</i> = number of parameters refined                           |                |
| Residual electron density in final                                |                |
| Difference Fourier map, e/Å <sup>3</sup>                          | -0.33, 0.47(6) |
| Max. (shift/σ) final cycle                                        | <0.001         |
| Mean. (shift/σ) final cycle                                       | <0.001         |

**Table 2. Final fractional atomic coordinates and equivalent isotropic displacement parameters with s.u.'s in parentheses.**

**Atoms of the Asymmetric Unit.**

**Non-Hydrogen parameters**

| Atom | x           | y           | z           | $U_{eq}$ (Å <sup>2</sup> ) <sup>*</sup> |
|------|-------------|-------------|-------------|-----------------------------------------|
| Ni   | 0.22589(3)  | 0.26991(3)  | 0.36142(3)  | 0.00845(7)                              |
| O1   | 0.4035(2)   | 0.10655(19) | 0.3335(2)   | 0.0123(5)                               |
| O2   | 0.6792(2)   | 0.06366(19) | 0.2817(2)   | 0.0126(4)                               |
| O3   | 0.0484(2)   | 0.4429(2)   | 0.3559(2)   | 0.0113(5)                               |
| O4   | -0.1203(2)  | 0.59987(19) | 0.1877(2)   | 0.0130(4)                               |
| O5   | 0.0335(3)   | 0.1089(2)   | 0.3707(3)   | 0.0129(5)                               |
| O6   | 0.28236(19) | 0.2710(4)   | 0.61566(17) | 0.0126(4)                               |
| N1   | 0.4586(3)   | 0.3995(2)   | 0.3544(3)   | 0.0102(6)                               |
| N2   | 0.1701(3)   | 0.3048(2)   | 0.1043(2)   | 0.0093(5)                               |
| C1   | 0.5616(3)   | 0.1461(3)   | 0.3235(3)   | 0.0103(6)                               |
| C2   | 0.6172(3)   | 0.3013(2)   | 0.3758(3)   | 0.0093(6)                               |
| C3   | 0.7073(3)   | 0.2928(3)   | 0.5574(3)   | 0.0124(6)                               |
| C4   | 0.4257(3)   | 0.4713(3)   | 0.1917(3)   | 0.0109(6)                               |
| C5   | 0.3397(3)   | 0.3631(3)   | 0.0611(3)   | 0.0113(6)                               |
| C6   | -0.0197(3)  | 0.4908(3)   | 0.2136(3)   | 0.0105(6)                               |
| C7   | 0.0162(3)   | 0.4066(3)   | 0.0619(3)   | 0.0108(6)                               |
| C8   | -0.1550(3)  | 0.3249(3)   | -0.0136(3)  | 0.0154(6)                               |

**Hydrogen parameters:**

|      |           |          |           |           |
|------|-----------|----------|-----------|-----------|
| H2   | 0.703(4)  | 0.339(3) | 0.313(4)  | 0.006(6)  |
| H3   | 0.614(4)  | 0.257(5) | 0.621(3)  | 0.018(7)  |
| H3'  | 0.801(5)  | 0.227(4) | 0.566(5)  | 0.036(11) |
| H3'' | 0.752(5)  | 0.373(5) | 0.593(5)  | 0.024(9)  |
| H4   | 0.346(4)  | 0.548(3) | 0.203(3)  | 0.006(6)  |
| H4'  | 0.530(4)  | 0.510(4) | 0.162(4)  | 0.020(8)  |
| H5   | 0.423(3)  | 0.284(4) | 0.057(3)  | 0.016(7)  |
| H5'  | 0.318(4)  | 0.420(3) | -0.051(4) | 0.011(7)  |
| H7   | 0.044(4)  | 0.472(3) | -0.019(4) | 0.012(7)  |
| H8   | -0.184(3) | 0.253(4) | 0.057(3)  | 0.010(6)  |
| H8'  | -0.141(3) | 0.273(5) | -0.110(3) | 0.019(6)  |
| H8'' | -0.245(4) | 0.391(4) | -0.050(4) | 0.021(8)  |
| H11  | 0.468(4)  | 0.458(4) | 0.429(4)  | 0.024(9)  |
| H12  | 0.154(4)  | 0.230(4) | 0.046(4)  | 0.018(9)  |
| H13  | 0.027(4)  | 0.065(4) | 0.456(4)  | 0.017(8)  |
| H13' | -0.067(5) | 0.109(4) | 0.328(5)  | 0.032(10) |
| H14  | 0.223(5)  | 0.219(4) | 0.677(4)  | 0.022(9)  |
| H14' | 0.294(4)  | 0.338(4) | 0.647(3)  | 0.008(8)  |

<sup>\*</sup>)  $U_{eq} = 1/3 \sum_i \sum_j U_{ij} a_i^* a_j^* a_i \cdot a_j$ <sup>25</sup>



### Anisotropic (displacement) parameters ( $\text{\AA}^2$ )

|    | $U_{11}$    | $U_{22}$    | $U_{33}$    | $U_{23}$    | $U_{13}$   | $U_{12}$    |
|----|-------------|-------------|-------------|-------------|------------|-------------|
| Ni | 0.00888(12) | 0.00866(13) | 0.00823(12) | 0.00078(12) | 0.00266(8) | 0.00051(11) |
| O1 | 0.0114(8)   | 0.0093(9)   | 0.0165(8)   | 0.0011(7)   | 0.0036(7)  | 0.0003(6)   |
| O2 | 0.0116(7)   | 0.0126(8)   | 0.0137(7)   | -0.0023(6)  | 0.0028(6)  | 0.0010(6)   |
| O3 | 0.0121(8)   | 0.0122(9)   | 0.0097(8)   | 0.0000(7)   | 0.0020(6)  | 0.0008(7)   |
| O4 | 0.0144(7)   | 0.0117(8)   | 0.0134(7)   | -0.0003(6)  | 0.0035(6)  | 0.0039(6)   |
| O5 | 0.0092(8)   | 0.0145(10)  | 0.0150(9)   | 0.0035(7)   | 0.0023(7)  | -0.0016(7)  |
| O6 | 0.0169(7)   | 0.0117(8)   | 0.0098(6)   | -0.0008(10) | 0.0040(5)  | -0.0023(9)  |
| N1 | 0.0132(10)  | 0.010(1)    | 0.0073(9)   | -0.0001(7)  | 0.0018(7)  | 0.0014(7)   |
| N2 | 0.0103(8)   | 0.0087(11)  | 0.0090(8)   | -0.0011(6)  | 0.0017(7)  | 0.0005(6)   |
| C1 | 0.0116(9)   | 0.0113(11)  | 0.0075(9)   | 0.0022(8)   | 0.0001(8)  | -0.0001(8)  |
| C2 | 0.0089(8)   | 0.0079(12)  | 0.0116(9)   | -0.0002(7)  | 0.0030(7)  | 0.0001(7)   |
| C3 | 0.0127(9)   | 0.0111(14)  | 0.0123(9)   | -0.0021(8)  | -0.0004(7) | 0.0004(8)   |
| C4 | 0.012(1)    | 0.0102(11)  | 0.0105(9)   | 0.0010(8)   | 0.0021(8)  | 0.0000(8)   |
| C5 | 0.0109(9)   | 0.0128(11)  | 0.0106(9)   | 0.0001(8)   | 0.0031(8)  | -0.0001(8)  |
| C6 | 0.0104(9)   | 0.0092(10)  | 0.0125(10)  | -0.0012(8)  | 0.0041(8)  | -0.0020(8)  |
| C7 | 0.0113(9)   | 0.0117(11)  | 0.0093(9)   | 0.0001(8)   | 0.0019(7)  | 0.0020(7)   |
| C8 | 0.0138(10)  | 0.0181(12)  | 0.0134(10)  | -0.0043(9)  | -0.0004(9) | 0.0021(8)   |

Thermal vibration amplitudes ( $\text{\AA}^2$ )

$$F(\mathbf{h}) = F_o(\mathbf{h}) \exp \left( -2\pi^2 \sum_{i=1}^3 \sum_{j=1}^3 h_i h_j a_i^* a_j^* U_{ij} \right)$$

or

$$F(\mathbf{h}) = F_o(\mathbf{h}) \exp \left( -8\pi^2 U_{iso} (\sin(\theta)/\lambda)^2 \right)$$

**Table 3. Selected data on the geometry.**

Standard deviations in the last decimal place are given in parentheses.

**Interatomic Distances (Å)**

|    |     |            |    |     |          |
|----|-----|------------|----|-----|----------|
| Ni | -O1 | 2.0539(17) | N1 | -C2 | 1.485(3) |
| Ni | -O3 | 2.0753(17) | N1 | -C4 | 1.480(3) |
| Ni | -O5 | 2.085(2)   | N2 | -C5 | 1.490(3) |
| Ni | -O6 | 2.0704(14) | N2 | -C7 | 1.485(3) |
| Ni | -N1 | 2.133(2)   | C1 | -C2 | 1.528(3) |
| Ni | -N2 | 2.1181(17) | C2 | -C3 | 1.537(3) |
| O1 | -C1 | 1.265(3)   | C4 | -C5 | 1.526(4) |
| O2 | -C1 | 1.262(3)   | C6 | -C7 | 1.539(4) |
| O3 | -C6 | 1.276(3)   | C7 | -C8 | 1.530(3) |
| O4 | -C6 | 1.253(3)   |    |     |          |

**Hydrogen parameters:**

|    |       |         |    |       |         |
|----|-------|---------|----|-------|---------|
| O5 | -H13  | 0.82(3) | C3 | -H3'' | 0.84(5) |
| O5 | -H13' | 0.78(4) | C4 | -H4   | 0.94(3) |
| O6 | -H14  | 0.88(4) | C4 | -H4'  | 0.94(3) |
| O6 | -H14' | 0.67(4) | C5 | -H5   | 0.97(3) |
| N1 | -H11  | 0.81(4) | C5 | -H5'  | 1.05(3) |
| N2 | -H12  | 0.84(4) | C7 | -H7   | 0.95(3) |
| C2 | -H2   | 0.96(3) | C8 | -H8   | 0.93(3) |
| C3 | -H3   | 1.01(3) | C8 | -H8'  | 0.95(3) |
| C3 | -H3'  | 0.92(4) | C8 | -H8'' | 0.92(3) |

**Bond Angles (deg.)**

|    |     |     |            |    |     |     |            |
|----|-----|-----|------------|----|-----|-----|------------|
| O1 | -Ni | -O3 | 171.95(7)  | C2 | -N1 | -C4 | 112.4(2)   |
| O1 | -Ni | -O5 | 87.62(7)   | Ni | -N2 | -C5 | 105.61(14) |
| O1 | -Ni | -O6 | 95.56(9)   | Ni | -N2 | -C7 | 109.91(14) |
| O1 | -Ni | -N1 | 81.23(7)   | C5 | -N2 | -C7 | 112.77(18) |
| O1 | -Ni | -N2 | 90.88(7)   | O1 | -C1 | -O2 | 124.3(2)   |
| O3 | -Ni | -O5 | 95.34(7)   | O1 | -C1 | -C2 | 117.7(2)   |
| O3 | -Ni | -O6 | 91.97(9)   | O2 | -C1 | -C2 | 117.8(2)   |
| O3 | -Ni | -N1 | 95.95(7)   | N1 | -C2 | -C1 | 111.01(19) |
| O3 | -Ni | -N2 | 81.33(7)   | N1 | -C2 | -C3 | 110.80(19) |
| O5 | -Ni | -O6 | 89.16(10)  | C1 | -C2 | -C3 | 106.32(18) |
| O5 | -Ni | -N1 | 168.71(8)  | N1 | -C4 | -C5 | 109.6(2)   |
| O5 | -Ni | -N2 | 97.40(9)   | N2 | -C5 | -C4 | 109.93(19) |
| O6 | -Ni | -N1 | 90.16(9)   | O3 | -C6 | -O4 | 124.5(2)   |
| O6 | -Ni | -N2 | 171.01(11) | O3 | -C6 | -C7 | 118.6(2)   |
| N1 | -Ni | -N2 | 84.61(9)   | O4 | -C6 | -C7 | 116.9(2)   |
| Ni | -O1 | -C1 | 116.12(17) | N2 | -C7 | -C6 | 111.61(19) |
| Ni | -O3 | -C6 | 115.96(15) | N2 | -C7 | -C8 | 110.9(2)   |

|    |     |     |            |    |     |     |            |
|----|-----|-----|------------|----|-----|-----|------------|
| Ni | -N1 | -C2 | 107.96(13) | C6 | -C7 | -C8 | 108.75(19) |
| Ni | -N1 | -C4 | 105.53(16) |    |     |     |            |

**Hydrogen parameters:**

|     |     |       |           |     |     |       |           |
|-----|-----|-------|-----------|-----|-----|-------|-----------|
| Ni  | -O5 | -H13  | 122(2)    | H3' | -C3 | -H3'' | 107(4)    |
| Ni  | -O5 | -H13' | 128(3)    | N1  | -C4 | -H4   | 104.5(15) |
| H13 | -O5 | -H13' | 101(4)    | N1  | -C4 | -H4'  | 113(2)    |
| Ni  | -O6 | -H14  | 124(2)    | C5  | -C4 | -H4   | 111.0(17) |
| Ni  | -O6 | -H14' | 113(2)    | C5  | -C4 | -H4'  | 110(2)    |
| H14 | -O6 | -H14' | 109(3)    | H4  | -C4 | -H4'  | 109(3)    |
| Ni  | -N1 | -H11  | 108(2)    | N2  | -C5 | -H5   | 109.3(18) |
| C2  | -N1 | -H11  | 111(2)    | N2  | -C5 | -H5'  | 112.6(17) |
| C4  | -N1 | -H11  | 112(2)    | C4  | -C5 | -H5   | 108.5(16) |
| Ni  | -N2 | -H12  | 116(2)    | C4  | -C5 | -H5'  | 106.3(16) |
| C5  | -N2 | -H12  | 102(2)    | H5  | -C5 | -H5'  | 110(2)    |
| C7  | -N2 | -H12  | 111(2)    | N2  | -C7 | -H7   | 107.7(18) |
| N1  | -C2 | -H2   | 108.8(17) | C6  | -C7 | -H7   | 110.4(18) |
| C1  | -C2 | -H2   | 111.1(17) | C8  | -C7 | -H7   | 107.4(19) |
| C3  | -C2 | -H2   | 108.8(19) | C7  | -C8 | -H8   | 111.6(15) |
| C2  | -C3 | -H3   | 107.3(15) | C7  | -C8 | -H8'  | 112.1(16) |
| C2  | -C3 | -H3'  | 108(3)    | C7  | -C8 | -H8'' | 109(2)    |
| C2  | -C3 | -H3'' | 112(3)    | H8  | -C8 | -H8'  | 104(3)    |
| H3  | -C3 | -H3'  | 110(3)    | H8  | -C8 | -H8'' | 116(3)    |
| H3  | -C3 | -H3'' | 112(4)    | H8' | -C8 | -H8'' | 104(3)    |

**Torsion Angles (deg.)**

|    |     |     |     |             |
|----|-----|-----|-----|-------------|
| O5 | -Ni | -O1 | -C1 | -178.65(18) |
| O6 | -Ni | -O1 | -C1 | -89.73(18)  |
| N1 | -Ni | -O1 | -C1 | -0.43(17)   |
| N2 | -Ni | -O1 | -C1 | 83.98(17)   |
| O5 | -Ni | -O3 | -C6 | -94.40(18)  |
| O6 | -Ni | -O3 | -C6 | 176.26(18)  |
| N1 | -Ni | -O3 | -C6 | 85.89(18)   |
| N2 | -Ni | -O3 | -C6 | 2.29(17)    |
| O1 | -Ni | -N1 | -C2 | -13.78(16)  |
| O1 | -Ni | -N1 | -C4 | 106.62(15)  |
| O3 | -Ni | -N1 | -C2 | 173.82(16)  |
| O3 | -Ni | -N1 | -C4 | -65.78(15)  |
| O6 | -Ni | -N1 | -C2 | 81.82(18)   |
| O6 | -Ni | -N1 | -C4 | -157.78(17) |
| N2 | -Ni | -N1 | -C2 | -105.51(17) |
| N2 | -Ni | -N1 | -C4 | 14.89(15)   |
| O1 | -Ni | -N2 | -C5 | -67.10(15)  |
| O1 | -Ni | -N2 | -C7 | 170.99(15)  |
| O3 | -Ni | -N2 | -C5 | 110.88(15)  |
| O3 | -Ni | -N2 | -C7 | -11.04(15)  |

|    |     |     |     |             |
|----|-----|-----|-----|-------------|
| O5 | -Ni | -N2 | -C5 | -154.81(15) |
| O5 | -Ni | -N2 | -C7 | 83.28(16)   |
| N1 | -Ni | -N2 | -C5 | 14.00(15)   |
| N1 | -Ni | -N2 | -C7 | -107.91(16) |
| Ni | -O1 | -C1 | -O2 | -168.82(19) |
| Ni | -O1 | -C1 | -C2 | 15.2(3)     |
| Ni | -O3 | -C6 | -O4 | -175.40(19) |
| Ni | -O3 | -C6 | -C7 | 7.3(3)      |
| Ni | -N1 | -C2 | -C1 | 24.1(2)     |
| Ni | -N1 | -C2 | -C3 | -93.84(18)  |
| C4 | -N1 | -C2 | -C1 | -91.9(2)    |
| C4 | -N1 | -C2 | -C3 | 150.2(2)    |
| Ni | -N1 | -C4 | -C5 | -41.2(2)    |
| C2 | -N1 | -C4 | -C5 | 76.3(2)     |
| Ni | -N2 | -C5 | -C4 | -40.6(2)    |
| C7 | -N2 | -C5 | -C4 | 79.5(2)     |
| Ni | -N2 | -C7 | -C6 | 17.1(2)     |
| Ni | -N2 | -C7 | -C8 | -104.33(18) |
| C5 | -N2 | -C7 | -C6 | -100.5(2)   |
| C5 | -N2 | -C7 | -C8 | 138.1(2)    |
| O1 | -C1 | -C2 | -N1 | -27.2(3)    |
| O1 | -C1 | -C2 | -C3 | 93.4(2)     |
| O2 | -C1 | -C2 | -N1 | 156.5(2)    |
| O2 | -C1 | -C2 | -C3 | -82.9(3)    |
| N1 | -C4 | -C5 | -N2 | 57.2(3)     |
| O3 | -C6 | -C7 | -N2 | -16.8(3)    |
| O3 | -C6 | -C7 | -C8 | 105.8(2)    |
| O4 | -C6 | -C7 | -N2 | 165.7(2)    |
| O4 | -C6 | -C7 | -C8 | -71.7(3)    |

#### Hydrogen parameters:

|    |     |     |       |         |
|----|-----|-----|-------|---------|
| O1 | -Ni | -O5 | -H13  | 83(3)   |
| O1 | -Ni | -O5 | -H13' | -137(4) |
| O3 | -Ni | -O5 | -H13  | -104(3) |
| O3 | -Ni | -O5 | -H13' | 35(4)   |
| O6 | -Ni | -O5 | -H13  | -12(3)  |
| O6 | -Ni | -O5 | -H13' | 127(4)  |
| N2 | -Ni | -O5 | -H13  | 174(3)  |
| N2 | -Ni | -O5 | -H13' | -47(4)  |
| O1 | -Ni | -O6 | -H14  | -92(3)  |
| O1 | -Ni | -O6 | -H14' | 134(3)  |
| O3 | -Ni | -O6 | -H14  | 91(3)   |
| O3 | -Ni | -O6 | -H14' | -43(3)  |
| O5 | -Ni | -O6 | -H14  | -4(3)   |
| O5 | -Ni | -O6 | -H14' | -139(3) |
| N1 | -Ni | -O6 | -H14  | -173(3) |
| N1 | -Ni | -O6 | -H14' | 53(3)   |
| O1 | -Ni | -N1 | -H11  | -134(2) |
| O3 | -Ni | -N1 | -H11  | 54(2)   |
| O6 | -Ni | -N1 | -H11  | -38(2)  |
| N2 | -Ni | -N1 | -H11  | 135(2)  |
| O1 | -Ni | -N2 | -H12  | 45(2)   |

|     |     |     |       |            |
|-----|-----|-----|-------|------------|
| O3  | -Ni | -N2 | -H12  | -138(2)    |
| O5  | -Ni | -N2 | -H12  | -43(2)     |
| N1  | -Ni | -N2 | -H12  | 126(2)     |
| Ni  | -N1 | -C2 | -H2   | 147(2)     |
| C4  | -N1 | -C2 | -H2   | 31(2)      |
| H11 | -N1 | -C2 | -C1   | 142(2)     |
| H11 | -N1 | -C2 | -C3   | 24(3)      |
| H11 | -N1 | -C2 | -H2   | -95(3)     |
| Ni  | -N1 | -C4 | -H4   | 77.9(18)   |
| Ni  | -N1 | -C4 | -H4'  | -164(2)    |
| C2  | -N1 | -C4 | -H4   | -164.7(18) |
| C2  | -N1 | -C4 | -H4'  | -46(2)     |
| H11 | -N1 | -C4 | -C5   | -159(2)    |
| H11 | -N1 | -C4 | -H4   | -40(3)     |
| H11 | -N1 | -C4 | -H4'  | 79(3)      |
| Ni  | -N2 | -C5 | -H5   | 78.4(16)   |
| Ni  | -N2 | -C5 | -H5'  | -158.9(17) |
| C7  | -N2 | -C5 | -H5   | -161.5(16) |
| C7  | -N2 | -C5 | -H5'  | -38.8(17)  |
| H12 | -N2 | -C5 | -C4   | -162(2)    |
| H12 | -N2 | -C5 | -H5   | -43(3)     |
| H12 | -N2 | -C5 | -H5'  | 80(3)      |
| Ni  | -N2 | -C7 | -H7   | 138(2)     |
| C5  | -N2 | -C7 | -H7   | 21(2)      |
| H12 | -N2 | -C7 | -C6   | 147(2)     |
| H12 | -N2 | -C7 | -C8   | 25(2)      |
| H12 | -N2 | -C7 | -H7   | -92(3)     |
| O1  | -C1 | -C2 | -H2   | -148(2)    |
| O2  | -C1 | -C2 | -H2   | 35(2)      |
| N1  | -C2 | -C3 | -H3   | 58(3)      |
| N1  | -C2 | -C3 | -H3'  | 177(2)     |
| N1  | -C2 | -C3 | -H3'' | -65(3)     |
| C1  | -C2 | -C3 | -H3   | -63(3)     |
| C1  | -C2 | -C3 | -H3'  | 56(2)      |
| C1  | -C2 | -C3 | -H3'' | 174(3)     |
| H2  | -C2 | -C3 | -H3   | 178(3)     |
| H2  | -C2 | -C3 | -H3'  | -64(3)     |
| H2  | -C2 | -C3 | -H3'' | 54(3)      |
| N1  | -C4 | -C5 | -H5   | -62.3(18)  |
| N1  | -C4 | -C5 | -H5'  | 179.3(17)  |
| H4  | -C4 | -C5 | -N2   | -57.7(18)  |
| H4  | -C4 | -C5 | -H5   | -177(2)    |
| H4  | -C4 | -C5 | -H5'  | 64(2)      |
| H4' | -C4 | -C5 | -N2   | -178(2)    |
| H4' | -C4 | -C5 | -H5   | 63(3)      |
| H4' | -C4 | -C5 | -H5'  | -56(3)     |
| O3  | -C6 | -C7 | -H7   | -137(2)    |
| O4  | -C6 | -C7 | -H7   | 46(2)      |
| N2  | -C7 | -C8 | -H8   | 58(2)      |
| N2  | -C7 | -C8 | -H8'  | -59(3)     |
| N2  | -C7 | -C8 | -H8'' | -173(2)    |
| C6  | -C7 | -C8 | -H8   | -65(2)     |
| C6  | -C7 | -C8 | -H8'  | 178(3)     |

|    |     |     |      |        |
|----|-----|-----|------|--------|
| C6 | -C7 | -C8 | -H8" | 64(2)  |
| H7 | -C7 | -C8 | -H8  | 175(3) |
| H7 | -C7 | -C8 | -H8' | 59(3)  |
| H7 | -C7 | -C8 | -H8" | -56(3) |

The sign of the torsion angle is positive if when looking from atom-2 to atom-3 a clockwise motion of atom-1 would superimpose it on atom-4.

**Table 4.**

Geometry of intra- and intermolecular hydrogen bonds (Å,°) with *s.u.*'s in parentheses

| D-H...A        | [ARU-code] | D-H(Å)  | H...A(Å) | D...A(Å) | D-H... A(°) |
|----------------|------------|---------|----------|----------|-------------|
| N1 --H11 ..O1  | [ 2656.01] | 0.81(4) | 2.45(3)  | 3.228(3) | 162(3)      |
| N2 --H12 ..O4  | [ 2545.01] | 0.84(4) | 2.25(3)  | 3.034(2) | 156(3)      |
| O5 --H13 ..O3  | [ 2546.01] | 0.82(3) | 2.08(3)  | 2.885(3) | 167(3)      |
| O5 --H13' ..O2 | [ 1455.01] | 0.78(4) | 1.93(4)  | 2.679(3) | 161(4)      |
| O6 --H14 ..O4  | [ 2546.01] | 0.88(4) | 1.83(4)  | 2.707(3) | 174(4)      |
| O6 --H14' ..O2 | [ 2656.01] | 0.67(4) | 2.16(4)  | 2.821(4) | 173(3)      |
| C3 --H3 ..O6   | [ ]        | 1.01(3) | 2.50(3)  | 3.335(3) | 140(2)      |
| C3 --H3" ..O1  | [ 2656.01] | 0.84(5) | 2.57(4)  | 3.179(3) | 130(3)      |
| C5 --H5' ..O2  | [ 2655.01] | 1.05(3) | 2.32(3)  | 3.364(3) | 170(2)      |

Translation of ARU-code to Equivalent Position Code

=====  
[ 2656. ] = 1-x,1/2+y,1-z  
[ 1455. ] = -1+x,y,z  
[ 2546. ] = -x,-1/2+y,1-z  
[ 2545. ] = -x,-1/2+y,-z  
[ 2655. ] = 1-x,1/2+y,-z

CIF file :

>>>> 932753

(Cambridge Crystallographic Data Centre).

**Table S2.** Conformations of  $N$ -membered Rings ( $N \leq 8$ )

| Ring Size | Definition                               | Descriptive Name | Descriptive Symbol |
|-----------|------------------------------------------|------------------|--------------------|
| $N$       |                                          |                  |                    |
| 4         | $q_2 \neq 0$                             | puckered form    |                    |
| 5         | $q_2 > 0; \phi_2 = 0$                    | envelope         |                    |
|           | $q_2 > 0; \phi_2 = \pi/2$                | twist form       |                    |
| 6         | $q_3 = 0; q_2 > 0; \phi_2 = 0$           | boat             |                    |
|           | $q_3 = 0; q_2 > 0; \phi_2 = \pi/2$       | twist-boat       |                    |
|           | $q_2 = 0; q_3 \neq 0$                    | chair            |                    |
| 7         | $q_3 = 0; q_2 > 0; \phi_2 = 0$           | boat             |                    |
|           | $q_3 = 0; q_2 > 0; \phi_2 = \pi/2$       | twist-boat       |                    |
|           | $q_2 = 0; q_3 > 0; \phi_3 = 0$           | chair            |                    |
|           | $q_2 = 0; q_3 > 0; \phi_3 = \pi/2$       | twist-chair      |                    |
| 8         | $q_4 = q_3 = 0; q_2 > 0; \phi_2 = 0$     | boat-boat        |                    |
|           | $q_4 = q_3 = 0; q_2 > 0; \phi_2 = \pi/2$ | twist-boat       |                    |
|           | $q_4 = q_2 = 0; q_3 > 0; \phi_3 = 0$     | long-chair       |                    |
|           | $q_4 = q_2 = 0; q_3 > 0; \phi_3 = \pi/2$ | twist-chair      |                    |
|           | $q_3 = q_2 = 0; q_4 \neq 0$              | crown            |                    |

**Table 3**  
 3-Center, 2-Electron A:-B:-C Hyperbonds ( $\beta$  orbitals) (A-B :C  $\Leftrightarrow$  A: B-C).

| Hypobond<br>A:-B:-C    | %A-B/%B-C | OCC.   | NBOs                  |                     | 3-center hybrids |      |      | DA<br>Energy <sup>3</sup> |
|------------------------|-----------|--------|-----------------------|---------------------|------------------|------|------|---------------------------|
|                        |           |        | BD <sup>1</sup> (A-B) | LP <sup>2</sup> (C) | h(A)             | h(B) | h(C) |                           |
| <b>edda</b>            |           |        |                       |                     |                  |      |      |                           |
| N 20:-Ni 1:- O 2       | 65.7/34.3 | 1.9789 | 2                     | 59                  | 3                | 4    | 90   | 76.63                     |
| N 21:-Ni 1:- O 5       | 64.2/35.8 | 1.9789 | 3                     | 61                  | 5                | 6    | 92   |                           |
| <b>MeOhedda</b>        |           |        |                       |                     |                  |      |      |                           |
| N 22:-Ni 1:- O 5       | 62.3/37.7 | 1.9683 | 1                     | 72                  | 1                | 2    | 110  | 66.42                     |
| N 24:-Ni 1:- O 2       | 62.7/37.3 | 1.9697 | 2                     | 70                  | 3                | 4    | 108  |                           |
| O 37:-Ni 1:- O 35      | 50.7/49.3 | 1.9467 | 3                     | 80                  | 5                | 6    | 118  |                           |
| <b>S,S-eddp</b>        |           |        |                       |                     |                  |      |      |                           |
| N 18:-Ni 1:- O 5       | 65.1/34.9 | 1.9798 | 1                     | 68                  | 1                | 2    | 104  | 75                        |
| N 19:-Ni 1:- O 2       | 65.0/35.0 | 1.9802 | 2                     | 66                  | 3                | 4    | 102  |                           |
| O 32:-Ni 1:- O 34      | 50.9/49.1 | 1.9493 | 3                     | 76                  | 5                | 6    | 112  |                           |
| <b>edap</b>            |           |        |                       |                     |                  |      |      |                           |
| N 14:-Ni 24:- O 1      | 66.4/33.6 | 1.9852 | 15                    | 60                  | 29               | 30   | 94   | 73.92                     |
| N 17:-Ni 24:- O 25     | 54.7/45.3 | 1.9565 | 22                    | 73                  | 43               | 44   | 107  |                           |
| O 22:-Ni 24:- O 23     | 61.6/38.4 | 1.9772 | 30                    | 68                  | 59               | 60   | 102  |                           |
| <b>eddp</b>            |           |        |                       |                     |                  |      |      |                           |
| N 25:-Ni 1:- O 3       | 66.2/33.8 | 1.9863 | 1                     | 68                  | 1                | 2    | 104  | 71.32                     |
| N 30:-Ni 1:- O 35      | 58.1/41.9 | 1.9633 | 2                     | 76                  | 3                | 4    | 112  |                           |
| O 34:-Ni 1:- O 2       | 63.7/36.3 | 1.9815 | 3                     | 66                  | 5                | 6    | 102  |                           |
| <b>1,3-pdda</b>        |           |        |                       |                     |                  |      |      |                           |
|                        |           |        |                       |                     |                  |      |      | 74.83                     |
| no 3-center hyperbonds |           |        |                       |                     |                  |      |      |                           |
| <b>dacoda</b>          |           |        |                       |                     |                  |      |      |                           |
| N 5:-Ni 1:- O 9        | 53.7/46.3 | 1.9499 | 1                     | 76                  | 1                | 2    | 115  | 99.67                     |
| <b>baboc</b>           |           |        |                       |                     |                  |      |      |                           |
| O 48:-Ni 1:- O 24      | 53.1/46.9 | 1.9553 | 3                     | 103                 | 5                | 6    | 163  | 95.4                      |

<sup>1</sup>BD means Bonding orbital

<sup>2</sup>LP means Lone Pair



# [Ni(S,S-eddp)(H<sub>2</sub>O)<sub>2</sub>]<sub>2</sub>\_IR

|                     |                                                                                                                             |                        |                          |
|---------------------|-----------------------------------------------------------------------------------------------------------------------------|------------------------|--------------------------|
| <b>File Name</b>    | C:\DOCUMENTS AND SETTINGS\ZORAN MATOVIC\LOCAL SETTINGS\TEMPORARY INTERNET FILES\CONTENT.IE5\OPGPNLSM\NI-SS-EDDP 17.04.13.SP |                        |                          |
| <b>Date Stamp</b>   | wed apr 17 00:22:41 2013                                                                                                    | <b>Date</b>            | wed apr 17 00:22:41 2013 |
| <b>Instrument</b>   | Spectrum One                                                                                                                | <b>Spectral Region</b> | IR                       |
| <b>Y Axis</b>       | %Transmittance                                                                                                              | <b>Spectrum Range</b>  | 450.0000 - 4000.0000     |
| <b>Data Spacing</b> | 1.0000                                                                                                                      | <b>Points Count</b>    | 3551                     |

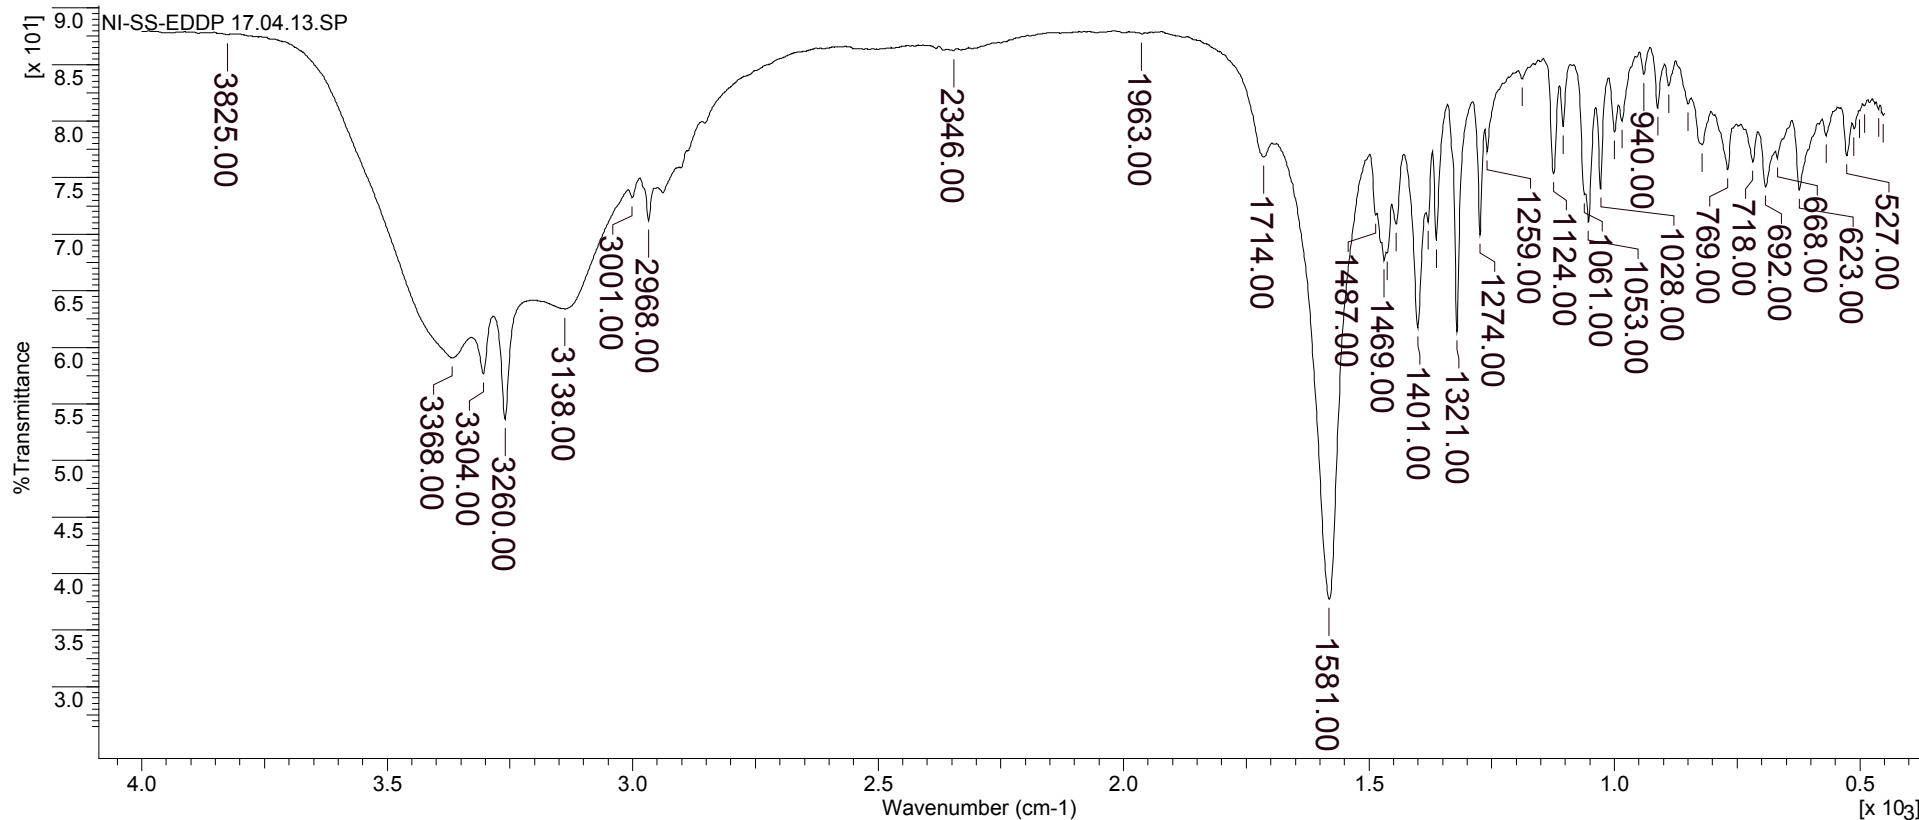

| No | cm-1   | %T     | Intensity |
|----|--------|--------|-----------|
| 1  | 453.00 | 80.488 | W         |
| 2  | 462.00 | 81.042 | W         |
| 3  | 490.00 | 81.352 | W         |
| 4  | 501.00 | 80.880 | W         |
| 5  | 512.00 | 79.343 | W         |
| 6  | 527.00 | 76.941 | W         |
| 7  | 569.00 | 78.724 | W         |
| 8  | 623.00 | 73.914 | W         |
| 9  | 668.00 | 76.646 | W         |
| 10 | 692.00 | 74.149 | W         |
| 11 | 718.00 | 76.371 | W         |
| 12 | 769.00 | 75.672 | W         |

| No | cm-1    | %T     | Intensity |
|----|---------|--------|-----------|
| 13 | 821.00  | 77.910 | W         |
| 14 | 850.00  | 81.509 | W         |
| 15 | 889.00  | 83.097 | VW        |
| 16 | 912.00  | 81.118 | W         |
| 17 | 940.00  | 84.105 | VW        |
| 18 | 985.00  | 79.994 | W         |
| 19 | 1000.00 | 79.016 | W         |
| 20 | 1028.00 | 74.013 | W         |
| 21 | 1053.00 | 71.042 | M         |
| 22 | 1061.00 | 73.516 | W         |
| 23 | 1105.00 | 79.509 | W         |
| 24 | 1124.00 | 75.371 | W         |
| 25 | 1188.00 | 83.708 | VW        |
| 26 | 1259.00 | 77.255 | W         |
| 27 | 1274.00 | 69.919 | M         |
| 28 | 1321.00 | 61.408 | M         |
| 29 | 1363.00 | 69.444 | M         |
| 30 | 1380.00 | 71.036 | M         |
| 31 | 1401.00 | 61.736 | M         |
| 32 | 1445.00 | 70.889 | M         |
| 33 | 1463.00 | 68.328 | M         |
| 34 | 1469.00 | 67.690 | M         |
| 35 | 1487.00 | 71.657 | M         |
| 36 | 1581.00 | 37.718 | VS        |
| 37 | 1714.00 | 76.826 | W         |
| 38 | 1963.00 | 87.692 | VW        |
| 39 | 2346.00 | 86.197 | VW        |
| 40 | 2968.00 | 71.175 | M         |
| 41 | 3001.00 | 73.226 | W         |
| 42 | 3138.00 | 63.393 | M         |
| 43 | 3260.00 | 53.636 | S         |
| 44 | 3304.00 | 57.661 | S         |
| 45 | 3368.00 | 59.061 | M         |
| 46 | 3825.00 | 87.635 | VW        |

# [Ni(edap)(H<sub>2</sub>O)<sub>2</sub>]<sub>IR</sub>

|                     |                                                                                         |                  |                |                                            |                          |                        |      |
|---------------------|-----------------------------------------------------------------------------------------|------------------|----------------|--------------------------------------------|--------------------------|------------------------|------|
| <b>File Name</b>    | E:\NAUKA\SVETLANA-DISERTACIJA\EDAP\IRSPEKTRI\01022008\NI-EDMAMP NEUTRALNO (01.02.08).SP |                  |                | <b>Date Stamp</b>                          | fri feb 01 14:16:36 2008 |                        |      |
| <b>Date</b>         | Fri Feb 01 14:16:39 2008                                                                | <b>Technique</b> | Infrared       | <b>Instrument</b>                          | Spectrum One             | <b>Spectral Region</b> | IR   |
| <b>X Axis</b>       | Wavenumber (cm-1)                                                                       | <b>Y Axis</b>    | %Transmittance | <b>Spectrum Range</b> 450.0000 - 4000.0000 |                          | <b>Points Count</b>    | 3551 |
| <b>Data Spacing</b> | 1.0000                                                                                  |                  |                |                                            |                          |                        |      |

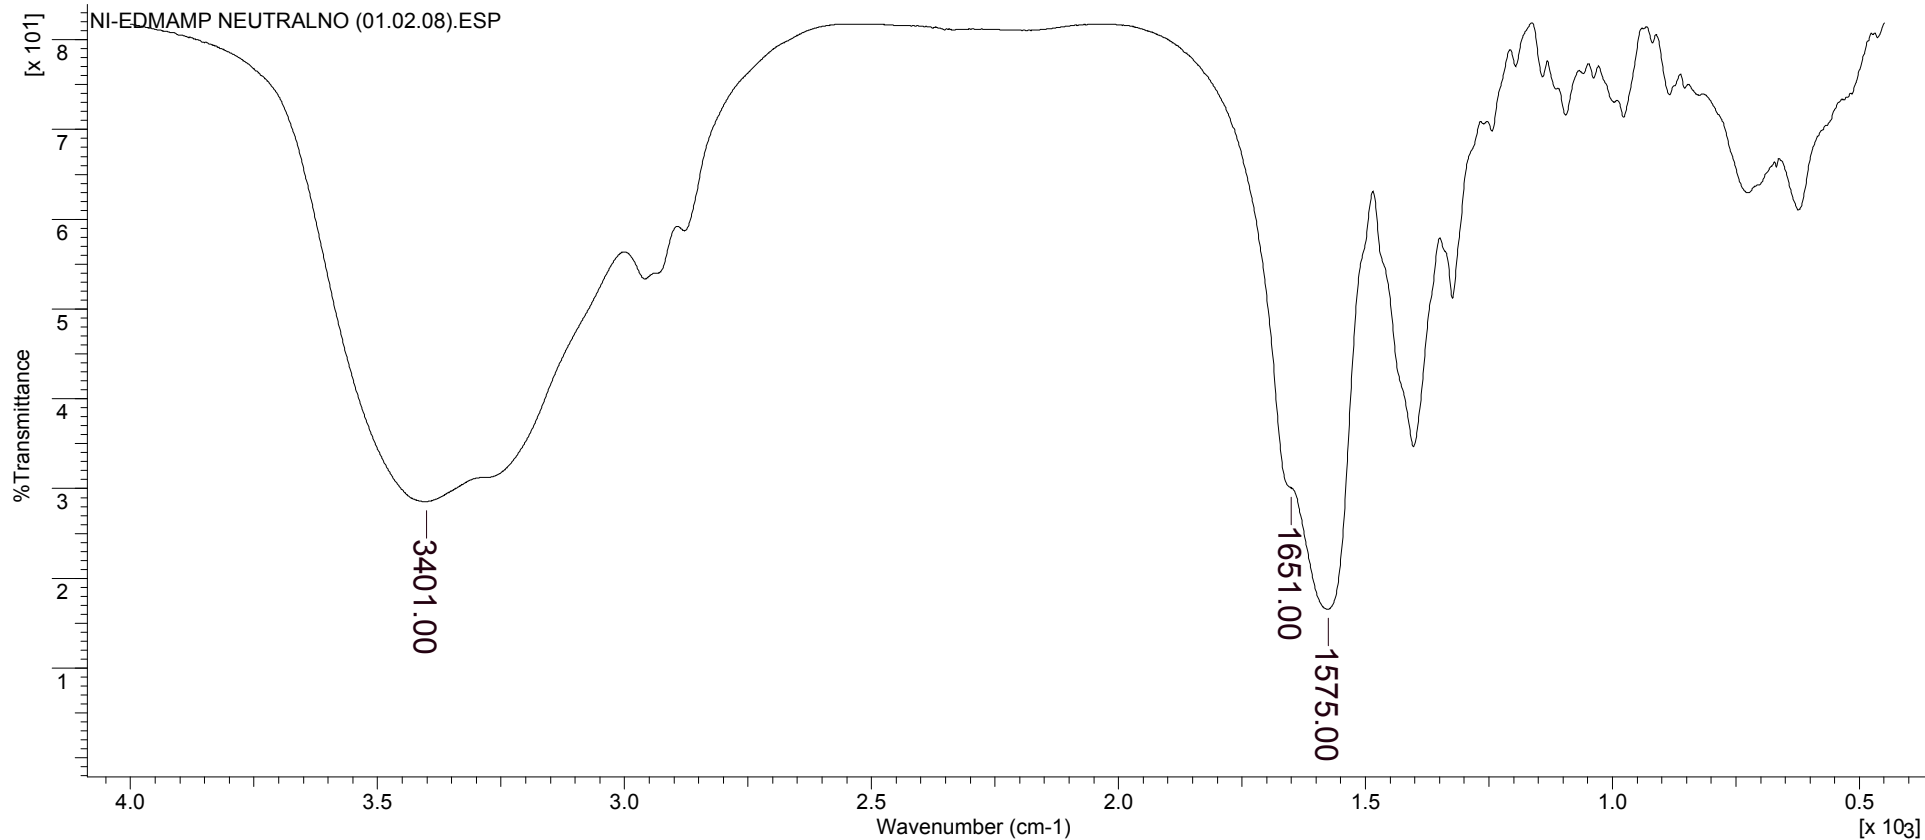

| No | cm-1    | %T     | Intensity |
|----|---------|--------|-----------|
| 1  | 1575.00 | 16.561 | VS        |
| 2  | 1651.00 | 30.070 | S         |
| 3  | 3401.00 | 28.543 | S         |

# Ni-SSeddp

|                     |                                                                                                                  |                        |                      |
|---------------------|------------------------------------------------------------------------------------------------------------------|------------------------|----------------------|
| <b>File Name</b>    | C:\DOCUMENTS AND SETTINGS\ZORAN MATOVIC\LOCAL SETTINGS\TEMPORARY INTERNET FILES\CONTENT.IE5\9AJA6ZOB\NIEDDPSS.SP |                        |                      |
| <b>Date Stamp</b>   | Mon Mar 18 12:53:54 2013                                                                                         | <b>Technique</b>       | UV-Visible           |
| <b>X Axis</b>       | Wavelength (nanometers)                                                                                          | <b>Y Axis</b>          | Absorbance           |
| <b>Points Count</b> | 901                                                                                                              | <b>Data Spacing</b>    | 1.0000               |
|                     |                                                                                                                  | <b>Spectral Region</b> | UV-Vis-NIR           |
|                     |                                                                                                                  | <b>Spectrum Range</b>  | 200.0000 - 1100.0000 |

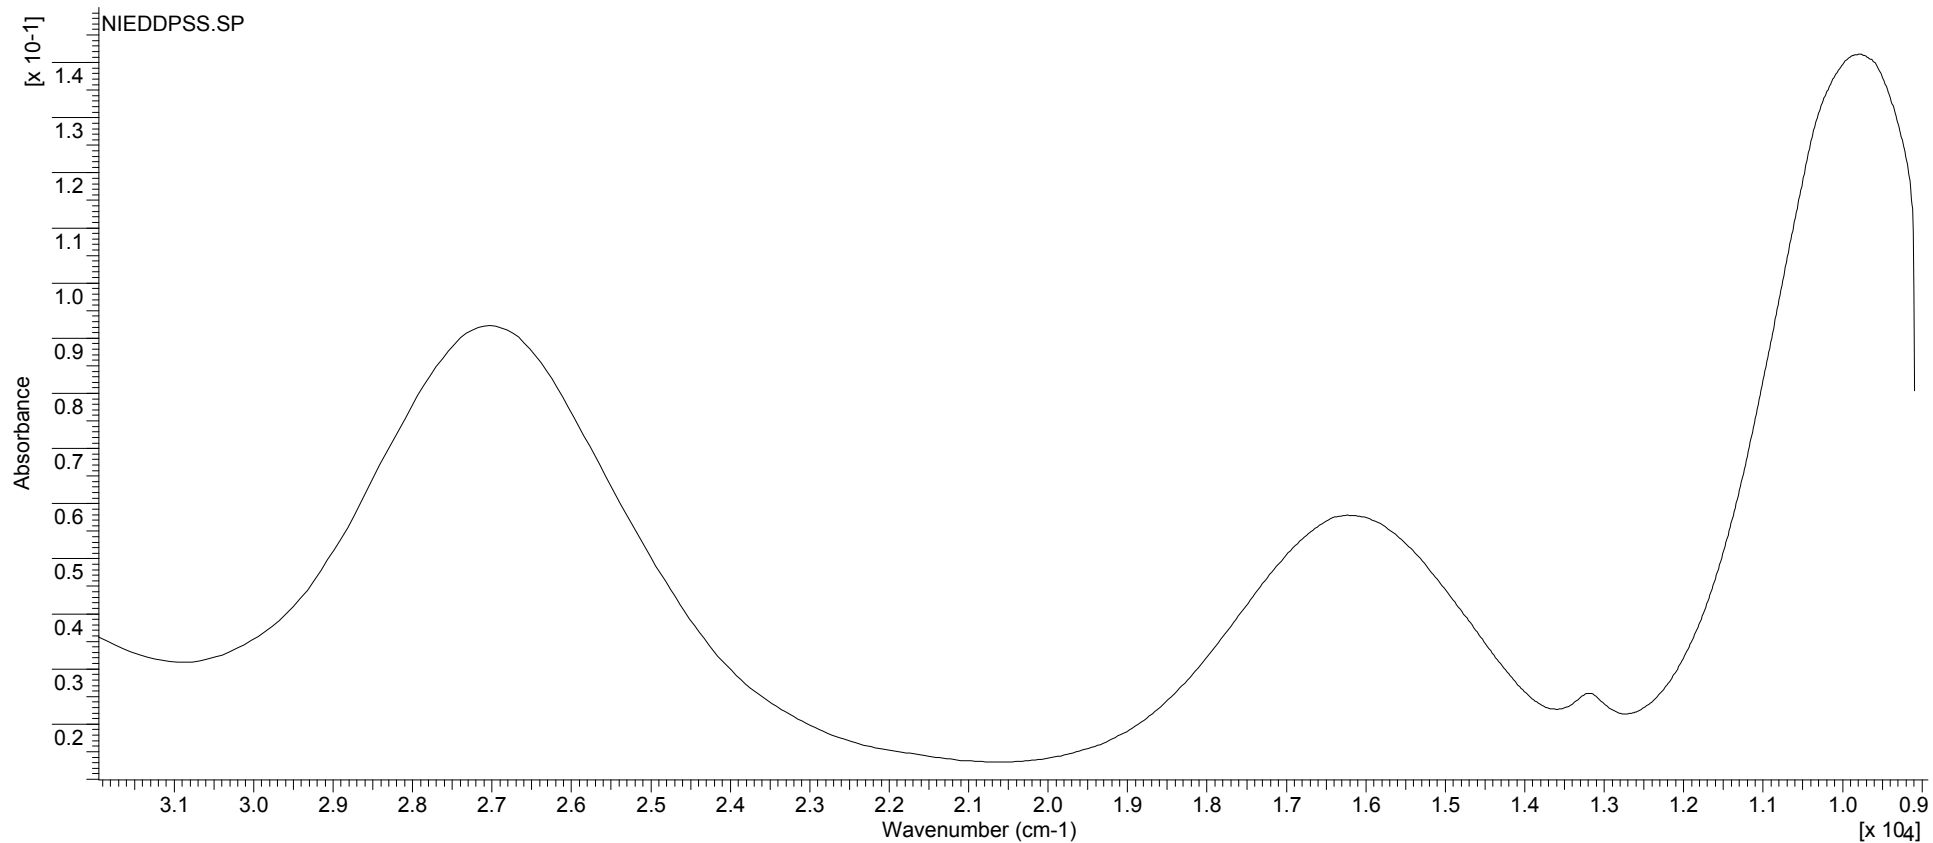

| No | cm-1     | A     | FWHH    | Asym  | Intensity |
|----|----------|-------|---------|-------|-----------|
| 1  | 9842.52  | 0.141 | -       | -     | VW        |
| 2  | 13192.61 | 0.026 | -       | -     | VW        |
| 3  | 16233.77 | 0.058 | 3992.56 | -0.04 | VW        |
| 4  | 27027.03 | 0.092 | 4405.67 | 0.00  | VW        |

# Ni-edap

|                  |                                                 |                        |                          |                     |                         |                     |        |
|------------------|-------------------------------------------------|------------------------|--------------------------|---------------------|-------------------------|---------------------|--------|
| <b>File Name</b> | H:\ZA STAMPU\SRECKO\NIEDAP\NICKEL\UV\NI-EDAP.SP | <b>Date Stamp</b>      | Tue May 22 14:53:01 2012 |                     |                         |                     |        |
| <b>Technique</b> | UV-Visible                                      | <b>Spectral Region</b> | UV-Vis-NIR               | <b>X Axis</b>       | Wavelength (nanometers) |                     |        |
| <b>Y Axis</b>    | Absorbance                                      | <b>Spectrum Range</b>  | 200.0000 - 1100.0000     | <b>Points Count</b> | 901                     | <b>Data Spacing</b> | 1.0000 |

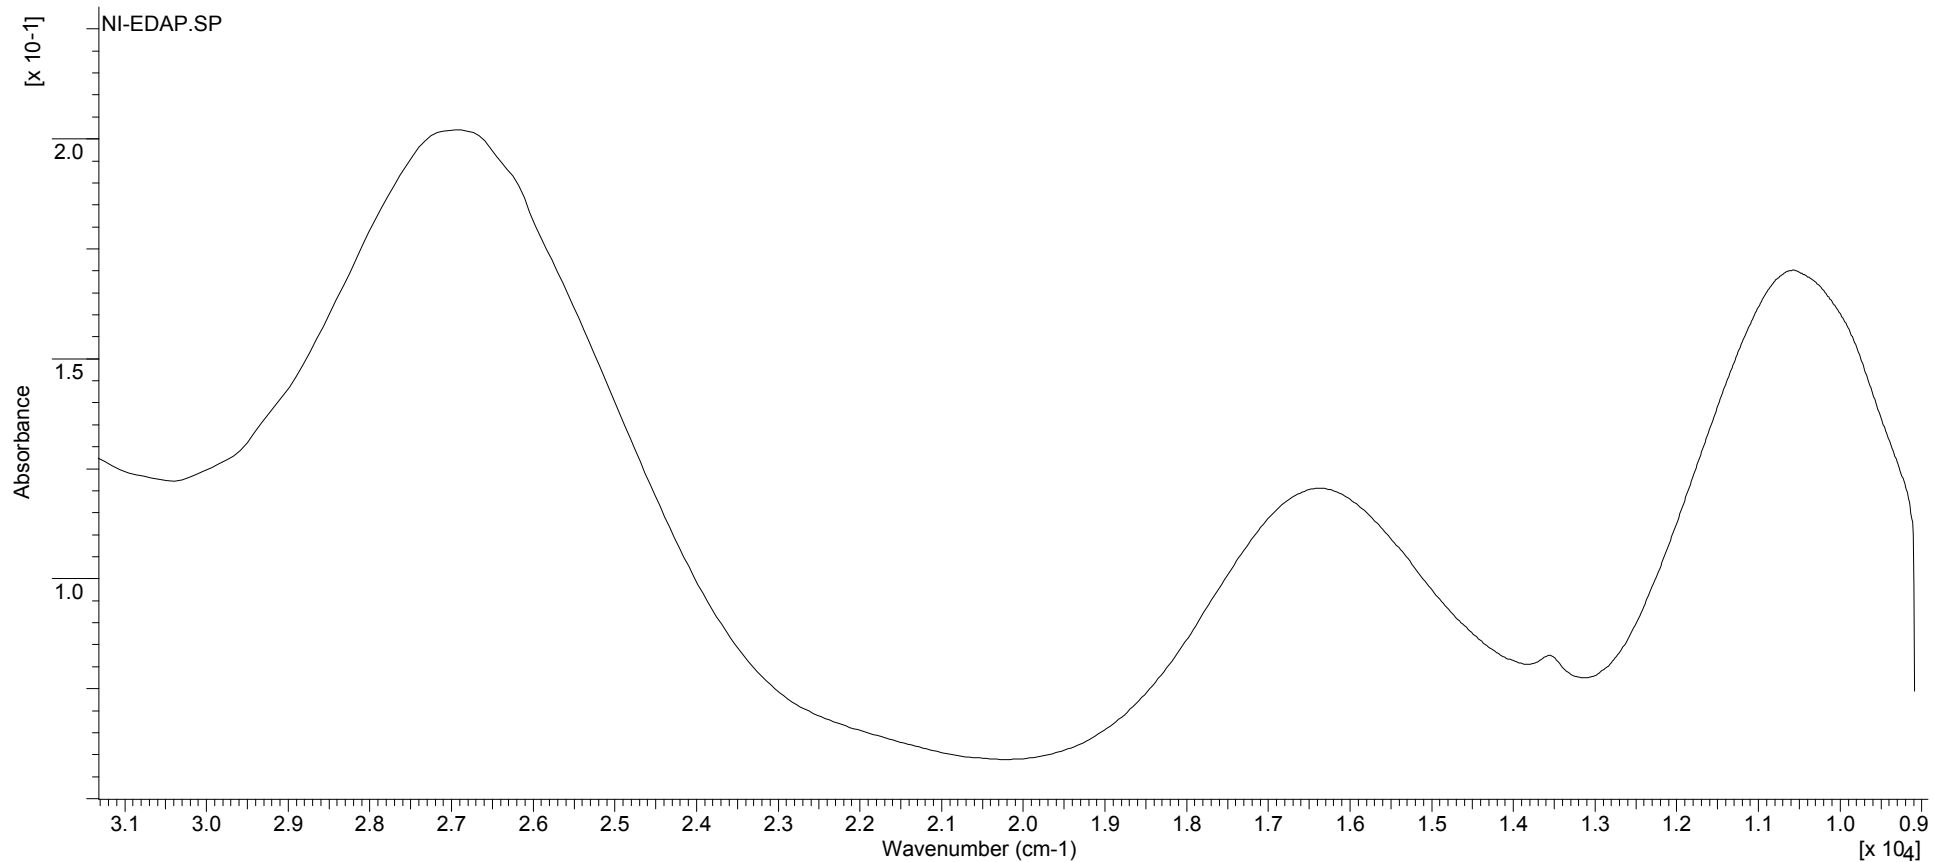

| No | cm-1     | A     | FWHH    | Asym | Intensity |
|----|----------|-------|---------|------|-----------|
| 1  | 10570.82 | 0.170 | 3542.07 | 0.40 | VW        |
| 2  | 13568.52 | 0.083 | -       | -    | VW        |
| 3  | 16339.87 | 0.121 | -       | -    | VW        |
| 4  | 26954.18 | 0.202 | -       | -    | VW        |
